# Supplementary material for: A sub-grid model for improving the spatial resolution of air quality modelling at a European scale
Source: Copernicus journal article supplement (doi:10.5194/gmd-2016-160), 2016-07-11
Supplement: Supplementary file 1 [file gmd-2016-160-supplement.zip]

Archive with 3 entries (3 files):
- MarkTheobald_SubGridModel_SupplementaryMaterial_24June2016.pdf
- Model_Code_plus_example_files.zip
- Plot_data_Fig4_Fig5.xlsx
