# Supplementary material for: A sub-grid model for improving the spatial resolution of air quality modelling at a European scale
Source: Copernicus journal article supplement (doi:10.5194/gmd-2016-160), 2016-07-11
Supplement: Supplementary file 1 [file Plot_data_Fig4_Fig5.xlsx]

## Sheet: NO2
Domain	Station Type	Measured Conc.	EMEP	Sub-grid model	Sub-grid model (emission heights/2)	Sub-grid model (emission heights × 2)	Sub-grid model (domain specific meteorology)	Sub-grid model (7 × 7 km2 emissions)
	[Traffic/Non-traffic]	[ug/m3]	[ug/m3]	[ug/m3]	[ug/m3]	[ug/m3]	[ug/m3]	[ug/m3]
Netherlands	NT	19.0244	23.0219	19.535	19.9925	19.221	17.8995	23.2737
Netherlands	NT	17.7447	21.2494	18.9875	18.995	18.9774	19.426	17.1817
Netherlands	NT	25.8198	21.2494	18.0608	18.1679	18.0017	17.887	21.9117
Netherlands	NT	17.3667	20.6868	20.569	20.6362	20.5229	19.4589	28.3516
Netherlands	T	43.4446	20.6868	38.9869	38.4328	39.2991	38.8096	28.0526
Netherlands	NT	28.4022	20.6868	33.7147	33.3033	33.9479	35.3555	28.2104
Netherlands	NT	29.0117	22.0811	32.0647	31.9031	32.1531	31.9635	31.0156
Netherlands	NT	21.3966	24.3705	22.457	22.339	22.5141	21.2843	25.0911
Netherlands	NT	20.0423	20.9126	20.2381	20.187	20.2647	19.5654	18.4575
Netherlands	NT	20.2325	22.0811	19.9249	19.9131	19.9256	18.8363	25.1987
Netherlands	T	40.8264	24.3705	36.1445	36.3667	36.0037	35.6123	29.8876
Netherlands	NT	23.7072	20.036	21.1439	21.1551	21.119	21.1744	21.1114
Netherlands	NT	35.6966	27.6428	40.847	40.5251	41.0025	42.3522	29.568
Netherlands	NT	31.295	24.3705	54.5407	53.9857	54.84	59.707	34.1071
Netherlands	T	45.9906	20.9126	42.4451	42.0218	42.6934	42.7583	39.025
Netherlands	T	51.9028	24.3705	51.2124	50.7915	51.418	52.9669	34.8969
Netherlands	NT	39.6158	24.3705	48.2295	47.8533	48.4194	49.6844	35.2793
Netherlands	T	34.5262	20.9126	37.2336	36.9334	37.412	38.668	37.7105
Netherlands	NT	28.2302	27.6428	42.3592	42.0917	42.5009	45.2506	39.4942
Netherlands	T	33.8403	23.0816	26.3385	26.3265	26.3445	30.6581	25.2278
Netherlands	NT	20.9281	25.6127	13.2392	13.359	13.174	13.1079	14.3584
Netherlands	NT	23.578	21.8677	12.8843	12.9729	12.8407	12.5932	13.2532
Netherlands	NT	17.0083	23.0816	19.6382	19.7103	19.5998	20.6605	22.6321
Netherlands	NT	20.3571	25.6127	13.6562	13.7779	13.5903	13.2495	14.4444
Netherlands	T	43.0944	25.6127	36.5835	36.5716	36.5805	37.686	35.2421
Netherlands	T	36.9721	25.6127	33.6017	33.6669	33.5816	35.3764	34.7531
Netherlands	T	40.0949	25.6127	29.3088	29.2493	29.3381	30.4962	21.9374
Netherlands	T	41.1248	23.0816	37.1235	36.9898	37.2042	38.6788	33.6841
Netherlands	NT	28.1365	23.1926	46.864	46.9383	46.8664	47.0208	39.1565
Netherlands	T	44.5943	23.1926	56.5986	56.5536	56.6593	59.5646	38.8656
Netherlands	T	43.2405	25.6127	64.9371	64.5745	65.1357	67.191	48.3808
Netherlands	NT	31.9682	25.6127	48.0361	47.8582	48.1335	49.912	43.0931
Netherlands	NT	18.3458	23.1926	13.89	13.9244	13.8689	13.3526	14.7349
Netherlands	NT	19.9139	16.0776	14.3231	14.3292	14.3168	13.8977	17.0694
Netherlands	NT	14.4299	13.5707	16.1897	16.1796	16.1928	17.1045	14.0166
Netherlands	NT	17.0504	16.968	14.2055	14.1574	14.2426	13.9831	12.7951
Netherlands	NT	14.8972	14.4139	11.7716	11.7875	11.7616	10.9512	13.1014
Netherlands	NT	15.8646	12.5135	11.82	11.8298	11.8141	11.8682	14.0491
Netherlands	NT	11.5886	12.5135	10.6805	10.6697	10.6869	10.5037	8.87182
Netherlands	NT	11.6681	12.4415	10.2225	10.2053	10.2231	10.0428	10.1435
Netherlands	NT	14.3286	11.4155	7.42768	7.45717	7.41262	7.10509	8.35875
Netherlands	T	38.729	11.4155	45.9783	45.4037	46.291	54.3569	31.7539
Netherlands	NT	13.8719	11.4155	18.1691	18.0475	18.2378	22.5286	17.379
Central Scotland	T	25	4.06878	14.0398	13.9472	14.0878	11.1431	9.66773
Central Scotland	NT	25	4.06878	34.4187	33.9444	34.6981	36.9612	15.3392
Central Scotland	T	73	4.06878	37.6112	37.2466	37.8195	37.5492	15.1364
Central Scotland	T	55	4.06878	25.2214	25.023	25.3304	22.9887	14.887
Central Scotland	NT	8	7.68001	9.64073	9.56568	9.68921	9.05885	8.54605
Central Scotland	T	53	6.43089	18.9954	18.6082	19.2245	15.17	13.3004
Central Scotland	T	52	6.43089	20.6244	20.1267	20.9174	18.2732	13.9263
Central Scotland	T	43	6.43089	20.6244	20.1267	20.9174	18.2732	13.9263
Central Scotland	T	47	6.43089	20.6244	20.1267	20.9174	18.2732	13.9263
Central Scotland	T	41	7.75803	14.1283	13.8292	14.2968	14.7942	15.2302
Central Scotland	T	33	5.45871	16.9036	16.4022	17.188	18.4121	13.2352
Central Scotland	T	37	5.45871	10.6058	10.2449	10.8174	10.8553	10.8634
Central Scotland	T	42	7.68001	22.2327	21.4799	22.6814	24.7082	18.5513
Central Scotland	T	41	7.68001	28.1349	27.1059	28.7378	28.5047	19.5205
Central Scotland	T	32	7.68001	38.5445	36.9635	39.443	38.1363	20.1228
Central Scotland	T	28	7.68001	22.2327	21.4799	22.6814	24.7082	18.5513
Central Scotland	T	75	7.68001	23.7399	22.9051	24.2334	24.3717	19.496
Central Scotland	NT	31	7.68001	24.3684	23.5282	24.8413	25.6493	19.6736
Central Scotland	NT	5	3.37469	2.27433	2.25901	2.28351	2.58642	2.01369
Central Scotland	NT	25	5.45871	13.4878	13.5505	13.4297	11.8894	8.63721
Central Scotland	T	24	5.45871	11.7847	11.4381	11.9248	9.68214	7.91328
Central Scotland	T	31	5.45871	11.7847	11.4381	11.9248	9.68214	7.91328
Central Scotland	T	46	6.43089	7.56848	7.54868	7.58408	7.27322	5.6313
Central Scotland	T	30	7.68001	9.96527	9.66191	10.125	7.78095	8.14758
Central Scotland	T	26	7.68001	8.51942	8.3543	8.60946	6.87363	10.3115
Central Scotland	NT	11	1.3799	5.55292	5.56338	5.54747	6.00968	4.49623
Central Scotland	NT	32	7.75803	31.3597	30.4754	31.8532	29.7819	21.0961
Central Scotland	T	32	7.75803	17.1636	16.8455	17.3391	16.4909	20.459
Central Scotland	T	43	7.75803	23.2771	22.5907	23.6608	21.8885	18.1351
Central Scotland	T	35	7.75803	37.9436	36.8243	38.571	37.4561	20.563
Central Scotland	T	48	7.75803	37.9436	36.8243	38.571	37.4561	20.563
Central Scotland	T	82	7.75803	30.1978	29.3574	30.6691	27.8695	21.0555
Central Scotland	NT	12	7.75803	10.3758	10.3875	10.3661	8.64047	12.7428
Central Scotland	NT	17	5.45871	12.1794	12.703	12.0425	10.9838	8.43788
Central Scotland	T	21	1.93337	8.69463	8.66481	8.71013	8.09539	7.75635
Central Scotland	T	36	5.45871	12.3389	12.0267	12.5229	13.1038	10.4318
Central Scotland	T	31	5.45871	16.1768	15.6971	16.4537	15.9021	15.0393
Central Scotland	NT	24	5.45871	18.0165	17.4574	18.3391	17.9312	14.7517
Central Scotland	T	25	5.45871	9.03322	8.71588	9.22004	8.71654	7.34838
Central Scotland	T	22	7.68001	8.49928	8.34845	8.59144	8.30839	5.85805
Central Scotland	T	87	7.75803	20.3622	20.0463	20.5411	19.2956	19.8153
Central Scotland	NT	25	7.75803	38.9276	37.9206	39.4872	41.5957	18.117
Central Scotland	T	60	2.79747	13.2005	12.4248	13.6487	13.4966	6.53365
Central Scotland	T	27	2.79747	13.2005	12.4248	13.6487	13.4966	6.53365
Central Scotland	T	37	7.75803	17.5786	17.3588	17.7047	16.7044	12.7841
Central Scotland	T	24	7.75803	15.7913	15.4752	15.9696	16.9678	11.9174
Central Scotland	T	19	7.75803	9.34655	9.27397	9.38546	8.94589	6.81886
Central Scotland	T	20	7.68001	8.23572	8.2145	8.19714	6.86361	6.65671

## Sheet: NH3
Domain	Network	Measured Conc.	EMEP	Sub-grid model	Sub-grid model (domain specific meteorology)	Sub-grid model (7 × 7 km2 emissions)
		[ug/m3]	[ug/m3]	[ug/m3]	[ug/m3]	[ug/m3]
Scotland	Local	0.770998	1.17407	2.29835	2.32991	1.24938
Scotland	Local	1.7195	1.17407	2.46253	2.4519	1.26232
Scotland	Local	0.71037	1.17407	2.64985	2.66233	1.20417
Scotland	Local	3.28135	1.17407	2.89254	3.03457	1.19247
Scotland	Local	0.390562	1.17407	1.71743	1.81629	1.19975
Scotland	Local	3.07049	1.17407	2.74403	2.87289	1.17476
Scotland	Local	2.61078	1.17407	2.7589	3.281	1.11433
Scotland	Local	0.393158	1.17407	1.32205	1.39972	1.18895
Scotland	Local	0.543929	1.17407	2.15848	2.27098	1.17254
Scotland	Local	2.02742	1.17407	2.54132	2.75383	1.15679
Scotland	Local	8.86118	1.17407	2.75539	3.14252	1.14116
Scotland	Local	3.38035	1.17407	2.80166	3.36385	1.11457
Scotland	Local	1.09716	1.17407	1.20705	1.21213	1.18168
Scotland	Local	0.713778	1.17407	1.87218	2.22051	1.14567
Scotland	Local	4.4245	1.17407	2.5391	3.01623	1.12269
Scotland	Local	2.1436	1.17407	1.53869	1.97839	1.12657
Scotland	Local	5.66268	1.17407	1.95736	2.51377	1.11628
Scotland	Local	0.615742	1.17407	1.13492	1.15644	1.16689
Scotland	Local	1.12839	1.17407	1.24158	1.4041	1.13403
Scotland	Local	1.1741	1.17407	1.30526	1.56777	1.12307
Scotland	Local	1.89659	1.17407	1.21089	1.42273	1.12468
Scotland	National	0.459167	0.606112	0.437375	0.520484	0.356088
Scotland	National	0.102143	0.190176	0.21962	0.229643	0.213032
Scotland	National	0.737692	1.17407	1.87218	2.22051	1.14567
Scotland	National	1.01643	1.17407	1.03999	1.0156	1.13811
Scotland	National	0.517857	1.17407	1.0495	1.0077	1.10383
Scotland	National	1.21714	1.17407	1.31535	1.30856	0.627906
Scotland	National	0.0807143	0.172703	0.174451	0.173901	0.180003
Scotland	National	0.0907143	0.172703	0.202091	0.195652	0.192522
Scotland	National	0.473846	0.273531	0.225018	0.21986	0.2091
Scotland	National	0.354	0.128528	0.163328	0.189265	0.126776
Scotland	National	0.107857	0.128528	0.138365	0.142094	0.1355
Scotland	National	0.107692	0.104907	0.104109	0.0838975	0.112827
Scotland	National	0.0653846	0.104907	0.108696	0.121473	0.0999489
Scotland	National	1.22357	0.423272	1.09017	1.06589	1.37618
Holland	National	2.7	3.84123	2.99035	2.92175	5.0584
Holland	National	4	3.84123	3.0559	2.92433	4.93538
Holland	National	2.8	3.84123	3.11734	2.88288	4.88236
Holland	National	1.9	3.3394	2.20513	2.2175	2.40362
Holland	National	2.2	1.14624	2.78715	2.70114	2.88847
Holland	National	2.1	3.3394	2.05688	1.98053	2.18094
Holland	National	1.9	1.14624	2.94276	2.76095	2.74611
Holland	National	2.7	1.14624	1.58724	1.59931	3.05774
Holland	National	7.3	6.02324	6.22424	6.26935	6.19766
Holland	National	8	6.02324	7.5242	7.53973	6.18355
Holland	National	7.6	8.37272	8.1538	8.60576	9.15065
Holland	National	4.4	6.02324	4.532	4.37873	6.18354
Holland	National	4.9	8.37272	7.49004	7.52159	9.15197
Holland	National	4	6.02324	4.40699	4.15821	6.26599
Holland	National	4.9	8.37272	8.11386	8.01256	9.2992
Holland	National	5.1	6.02324	4.9188	4.63981	6.96262
Holland	National	4.6	8.37272	8.54522	8.34875	9.51668
Holland	National	4.6	6.02324	5.03071	4.47121	7.06508
Holland	National	5.4	6.02324	5.32466	4.79261	7.19027
Holland	National	4.75	6.02324	5.51536	4.99312	7.27174
Holland	National	5.9	6.02324	6.03966	5.74781	7.18929
Holland	National	5.4	6.02324	5.40313	5.52296	7.05715
Holland	National	5.3	6.02324	5.97139	6.33142	7.12995
Holland	National	6.1	6.02324	5.51403	5.33453	7.21065
Holland	National	5.6	6.02324	5.81081	5.64464	7.21322
Holland	National	6.1	6.02324	5.64184	5.46963	7.16261
Holland	National	5.5	6.02324	7.43934	7.40019	7.22884
Holland	National	6.1	6.02324	6.52621	6.35058	7.21009
Holland	National	2.4	1.14624	1.66051	1.82286	1.55011
Holland	National	6.5	6.02324	6.19293	6.50015	7.51097
Holland	National	5.3	6.02324	5.58752	5.33272	6.71472
Holland	National	2	1.14624	2.07322	2.15733	1.79598
Holland	National	2	1.14624	1.43035	1.48053	1.52256
Holland	National	1.8	1.14624	1.58755	1.64475	1.63534
Holland	National	5	6.02324	6.40992	5.93912	6.40598
Holland	National	6.1	6.02324	7.27755	6.92924	6.29953
Holland	National	5.4	6.02324	5.95692	5.55463	6.52863
Holland	National	4.55	6.57967	5.95628	5.66793	7.9198
Holland	National	2.6	1.29614	1.22591	1.16335	1.56271
Holland	National	1.7	1.29614	1.28845	1.29205	1.56465
Holland	National	1.4	1.29614	1.42819	1.48815	1.73327
Holland	National	2.3	1.29614	1.584	1.66618	2.3658
Holland	National	10.5	7.31118	9.98723	9.50789	6.90568
Holland	National	10.5	7.31118	10.4055	10.6758	6.98704
Holland	National	3.4	7.31118	4.08973	4.1286	6.28923
Holland	National	3.8	5.81705	3.91676	3.95921	6.2922
Holland	National	2.9	5.81705	3.7882	3.79858	6.27818
Holland	National	5.8	5.81705	5.7249	7.08871	5.72203
Holland	National	4.4	5.81705	5.08612	5.88136	5.48033
Holland	National	4.7	5.81705	4.45412	4.81533	5.75348
Holland	National	5	5.81705	4.69951	5.19409	4.75509
Holland	National	4	5.81705	4.80711	5.40439	5.47477
Holland	National	3.3	5.81705	3.78671	3.79694	5.69353
Holland	National	2	5.81705	3.85979	3.73541	5.2319
Holland	National	2.2	2.18057	1.66173	1.40238	2.32334
Holland	National	2.1	2.18057	1.75094	1.45328	2.06233
Holland	National	3.2	2.18057	2.26722	1.92184	2.20903
Holland	National	4.15	7.03916	5.58156	5.59492	7.8935
Holland	National	4	7.03916	6.05001	6.64708	6.5478
Holland	National	4.1	7.03916	6.86988	6.88939	6.64293
Holland	National	4.1	7.03916	5.74788	5.7855	6.4817
Holland	National	4.9	7.03916	6.53386	6.57422	6.65205
Holland	National	4.6	7.03916	7.15123	7.07052	6.68595
Holland	National	4.5	5.81705	4.37001	3.91147	5.97133
Holland	National	4.9	7.03916	7.3077	7.56635	5.99849
Holland	National	3.3	7.03916	5.30958	5.31185	5.67762
Holland	National	5.4	5.81705	8.02891	8.5025	6.58449
Holland	National	4.4	5.81705	6.15369	6.0951	6.38129
Holland	National	4	5.81705	4.44157	4.34079	5.51128
Holland	National	5.5	5.81705	8.77785	8.05266	6.50829
Holland	National	3.7	5.81705	4.65268	4.68226	5.50783
Holland	National	3.35	7.03916	5.27107	4.98928	5.25449
Holland	National	4.5	7.03916	5.42389	5.26152	6.21709
Holland	National	3.9	5.81705	4.24539	3.99577	5.3463
Holland	National	5.6	7.03916	5.08661	4.88208	5.22114
Holland	National	5	7.03916	5.596	5.66741	6.07128
Holland	National	4.5	7.03916	5.53956	5.41323	6.2943
Holland	National	4.1	4.85242	4.89951	4.59687	5.31363
Holland	National	3.6	4.85242	4.60866	4.08019	5.23026
Holland	National	5.1	6.93441	5.51424	5.51474	6.75225
Holland	National	5.2	6.93441	5.57403	5.4414	7.15473
Holland	National	2.2	1.52941	0.386257	0.365206	0.47309
Holland	National	5.6	6.93441	5.1133	5.14378	6.28232
Holland	National	4.3	6.93441	5.05962	4.91886	7.09895
Holland	National	4.1	6.93441	5.39019	5.04087	6.69029
Holland	National	5.1	6.93441	5.83124	5.71429	6.31253
Holland	National	4.4	6.93441	5.82806	5.73356	6.42559
Holland	National	2.7	4.85242	3.62482	3.92642	3.74169
Holland	National	2.7	4.85242	2.82911	2.83884	3.79099
Holland	National	3.1	4.85242	2.81902	2.75249	3.77236
Holland	National	2.5	4.85242	2.97371	2.76179	3.87432
Holland	National	3.7	7.81536	5.00309	5.27388	7.51561
Holland	National	1.7	1.04714	0.603899	0.508165	0.610743
Holland	National	2.2	1.04714	0.592453	0.45591	0.6066
Holland	National	2.4	1.04714	0.555903	0.443789	0.581623
Holland	National	4.1	3.44268	3.18914	3.1019	4.28904
Holland	National	4	7.81536	4.45392	4.49404	7.62819
Holland	National	2.1	1.04714	0.613932	0.44947	0.643443
Holland	National	2.3	1.04714	0.534938	0.422668	0.579534
Holland	National	3	1.04714	0.565033	0.44875	0.616784
Holland	National	4.2	7.81536	4.5573	4.46292	7.70321
Holland	National	3	3.44268	3.04305	3.02382	4.27127
Holland	National	2.9	3.44268	2.82551	2.61639	4.89285
Holland	National	2.8	3.44268	3.81045	3.5483	4.96716
Holland	National	2.9	5.59523	3.45087	3.3428	4.44891
Holland	National	2.9	5.59523	3.75069	3.49655	4.54907
Holland	National	3.9	5.59523	3.79644	3.7678	4.55018
Holland	National	3.9	3.44268	3.52463	3.42992	3.5528
